# Supplementary material for: Quantum-Computational Investigation of Non-adiabatic Light-Matter Coupling Effects on Catalytic Surface Reactions
Source: Research Square preprint supplement (doi:10.21203/rs.3.rs-8176993/v1), 2025-11-25
Supplement: Supplementary file 1 [file 21e55da02343b7cb288b975b.xlsx]

## Sheet: Model Description
Q-LightMat Catalyst Computational Model
Research Topic	Quantum-Computational Investigation of Non-adiabatic Light-Matter Coupling Effects on Catalytic Surface Reactions
Generated Date	2025-11-21T22:48:36.961Z
Model Description
This model couples accurate electronic structure of the surface + adsorbate with quantized electromagnetic modes (Pauli-Fierz Hamiltonian).
It calculates Potential Energy Surfaces (PES) modified by strong light-matter coupling.
Sheet Guide
1. Model Description	This overview page
2. Parameters	Detailed list of input simulation parameters
3. PES Results	Raw data for Ground, Excited, and Polaritonic surfaces
4. Active Learning Logs	Training metrics from the ML acceleration pipeline

## Sheet: Parameters
Parameter	Value	Unit	Description
Cavity Frequency	2.5	eV	Resonant frequency of the quantized mode
Coupling Strength (g)	0.1	eV	Light-matter interaction strength (Rabi splitting proxy)
Temperature	300	K	Thermodynamic temperature of the surface
Cavity Loss	50	meV	Photon decay rate (kappa) / Dissipation
Field Intensity	0.05	a.u.	Strength of the external driving field

## Sheet: PES Results
reactionCoordinate	groundState	excitedState	lowerPolariton	upperPolariton
-2	2.725	5.725	2.70574	3.24426
-1.96	2.34955	5.33755	2.32985	2.85724
-1.92	2.00617	4.98217	1.98602	2.50233
-1.88	1.69339	4.65739	1.67276	2.17803
-1.84	1.40974	4.36174	1.38861	1.88288
-1.8	1.1538	4.0938	1.13214	1.61546
-1.76	0.924163	3.85216	0.901951	1.37437
-1.72	0.719465	3.63547	0.696675	1.15826
-1.68	0.538371	3.44237	0.514973	0.965768
-1.64	0.379574	3.27157	0.355538	0.79561
-1.6	0.2418	3.1218	0.217091	0.646509
-1.56	0.123804	2.9918	0.0983862	0.517223
-1.52	0.0243741	2.88037	-0.00179252	0.406541
-1.48	-0.0576739	2.78633	-0.0846312	0.313283
-1.44	-0.123492	2.70851	-0.151285	0.236302
-1.4	-0.1742	2.6458	-0.20288	0.17448
-1.36	-0.21089	2.59711	-0.240509	0.126729
-1.32	-0.234621	2.56138	-0.265238	0.0919958
-1.28	-0.246423	2.53758	-0.278101	0.0692551
-1.24	-0.247293	2.52471	-0.280101	0.0575145
-1.2	-0.2382	2.5218	-0.272212	0.0558122
-1.16	-0.22008	2.52792	-0.255379	0.0632181
-1.12	-0.19384	2.54216	-0.230514	0.0788335
-1.08	-0.160356	2.56364	-0.198502	0.101791
-1.04	-0.120471	2.59153	-0.160196	0.131255
-1	-0.075	2.625	-0.116421	0.166421
-0.96	-0.0247267	2.66327	-0.067971	0.206518
-0.92	0.0295965	2.7056	-0.0156101	0.250803
-0.88	0.0872477	2.75125	0.0399264	0.298569
-0.84	0.147536	2.79954	0.0979331	0.349138
-0.8	0.2098	2.8498	0.157734	0.401866
-0.76	0.273411	2.90141	0.218684	0.456137
-0.72	0.337769	2.95377	0.280167	0.511372
-0.68	0.402307	3.00631	0.341595	0.567019
-0.64	0.466486	3.05849	0.402413	0.622559
-0.6	0.5298	3.1098	0.462097	0.677503
-0.56	0.591772	3.15977	0.520151	0.731394
-0.52	0.651958	3.20796	0.576112	0.783804
-0.48	0.709942	3.25394	0.629551	0.834333
-0.44	0.76534	3.29734	0.680069	0.882612
-0.4	0.8178	3.3378	0.727301	0.928299
-0.36	0.866998	3.375	0.770918	0.971078
-0.32	0.912643	3.40864	0.810623	1.01066
-0.28	0.954473	3.43847	0.846154	1.04679
-0.24	0.992259	3.46426	0.877284	1.07923
-0.2	1.0258	3.4858	0.90382	1.10778
-0.16	1.05493	3.50293	0.925603	1.13225
-0.12	1.0795	3.5155	0.942508	1.1525
-0.08	1.09942	3.52342	0.954444	1.1684
-0.04	1.1146	3.5266	0.961349	1.17985
0	1.125	3.525	0.963197	1.1868
0.04	1.1306	3.5186	0.959989	1.18921
0.08	1.13142	3.50742	0.95176	1.18708
0.12	1.1275	3.4915	0.938574	1.18043
0.16	1.11893	3.47093	0.920525	1.16933
0.2	1.1058	3.4458	0.897738	1.15386
0.24	1.08826	3.41626	0.870365	1.13415
0.28	1.06647	3.38247	0.838591	1.11036
0.32	1.04064	3.34464	0.802629	1.08266
0.36	1.011	3.303	0.762721	1.05128
0.4	0.9778	3.2578	0.719139	1.01646
0.44	0.94134	3.20934	0.672187	0.978494
0.48	0.901942	3.15794	0.622195	0.937689
0.52	0.859958	3.10396	0.569527	0.89439
0.56	0.815772	3.04777	0.514572	0.848973
0.6	0.7698	2.9898	0.457753	0.801847
0.64	0.722486	2.93049	0.399523	0.753449
0.68	0.674307	2.87031	0.340362	0.704252
0.72	0.625769	2.80977	0.280783	0.654756
0.76	0.577411	2.74941	0.221328	0.605494
0.8	0.5298	2.6898	0.162569	0.557031
0.84	0.483536	2.63154	0.10511	0.509961
0.88	0.439248	2.57525	0.0495845	0.464911
0.92	0.397596	2.5216	-0.00334483	0.422538
0.96	0.359273	2.47127	-0.0529834	0.38353
1	0.325	2.425	-0.0986068	0.348607
1.04	0.295529	2.38353	-0.13946	0.318518
1.08	0.271644	2.34764	-0.174757	0.294046
1.12	0.25416	2.31816	-0.203682	0.276001
1.16	0.24392	2.29592	-0.225388	0.265228
1.2	0.2418	2.2818	-0.238999	0.262599
1.24	0.248707	2.27671	-0.243605	0.269019
1.28	0.265577	2.28158	-0.23827	0.285425
1.32	0.293379	2.29738	-0.222023	0.312781
1.36	0.33311	2.32511	-0.193866	0.352086
1.4	0.3858	2.3658	-0.152768	0.404368
1.44	0.452508	2.42051	-0.0976675	0.470684
1.48	0.534326	2.49033	-0.0274739	0.552126
1.52	0.632374	2.57637	0.0589354	0.649813
1.56	0.747804	2.6798	0.162713	0.764896
1.6	0.8818	2.8018	0.285043	0.898557
1.64	1.03557	2.94357	0.427138	1.05201
1.68	1.21037	3.10637	0.590245	1.2265
1.72	1.40747	3.29147	0.775638	1.42329
1.76	1.62816	3.50016	0.984624	1.6437
1.8	1.8738	3.7338	1.21854	1.88906
1.84	2.14574	3.99374	1.47875	2.16074
1.88	2.44539	4.28139	1.76666	2.46013
1.92	2.77417	4.59817	2.08369	2.78866
1.96	3.13355	4.94555	2.43131	3.14779
2	3.525	5.325	2.81099	3.53901

## Sheet: Active Learning Logs
generation	energyMAE	forceMAE	uncertainty
1	5.44497	0.208635	20
2	4.29702	0.175975	17
3	3.57397	0.144281	14
4	2.82059	0.118177	11
5	1.83259	0.0823721	8
6	1.64933	0.0757823	6.8
7	1.4844	0.0697197	5.78
8	1.33596	0.0641421	4.913
